# Supplementary material for: Benefits of metformin add-on insulin therapy (MAIT) for HbA1c and lipid profile in adolescents with type 1 diabetes mellitus: preliminary report from a double-blinded, placebo-controlled, randomized clinical trial
Source: publisher site journal article supplement (doi:10.1515/jpem-2021-0704), 2022-03-06
Supplement: Supplementary file 1 [file j_jpem-2021-0704_suppl.docx]

Supplementary table 1. Univariate and multivariate linear regression analysis to examine the metformin effect on HbA1c

|  | Univariate | | | | | Multivariate | | | | | |
| --- | --- | --- | --- | --- | --- | --- | --- | --- | --- | --- | --- |
| Variable | Unstandardized coefficients | | Standardized coefficients | T | p-Value | Unstandardized coefficients | | Standardized coefficients | T | p-Value | |
| B | Std. error | Beta | B | Std. error | Beta |
| Metformin | −0.740 | 0.398 | −0.259 | −1.857 | 0.069 | −0.590 | 0.380 | −0.158 | −1.193 | 0.080 | |
| Weight | 0.036 | 0.016 | 0.301 | 2.190 | 0.330 |  |  |  |  |  | |
| Puberty | 0.094 | 0.197 | 0.069 | 0.478 | 0.635 |  |  |  |  |  | |
| Gender | −0.033 | 0.425 | −0.011 | −0.079 | 0.938 |  |  |  |  |  | |
| Age | 0.125 | 0.112 | 0.159 | 1.116 | 0.270 |  |  |  |  |  | |
| BMI | 0.117 | 0.066 | 0.247 | 1.766 | 0.084 | 0.137 | 0.066 | 0.290 | 2.070 | 0.44 | |
| SBP | 0.017 | 0.017 | 0.141 | 0.987 | 0.329 |  |  |  |  |  | |
| DBP | 0.044 | 0.028 | 0.222 | 1.579 | 0.121 |  |  |  |  |  | |
| TG | 0.011 | 0.004 | 0.356 | 2.638 | 0.011 | 0.011 | 0.004 | 0.326 | 2.508 | 0.016 | |
| Chol | 0.005 | 0.004 | 0.168 | 1.183 | 0.243 |  |  |  |  |  | |
| LDL | 0.013 | 0.009 | 0.210 | 1.490 | 0.143 |  |  |  |  |  | |
| HDL | −0.027 | 0.017 | −0.225 | −1.597 | 0.094 | −0.030 | 0.016 | −0.252 | −1.826 | 0.074 | |
| SGOT | −0.109 | 0.048 | −0.315 | −2.297 | 0.026 | −0.117 | 0.045 | −0.336 | −2.611 | 0.012 | |
| SGPT | 0.014 | 0.080 | 0.026 | 0.181 | 0.857 |  |  |  |  |  | |
| BUN | 0.046 | 0.092 | 0.073 | 0.506 | 0.615 |  |  |  |  |  | |
| Cr | 1.277 | 1.205 | 0.151 | 1.059 | 0.295 |  |  |  |  |  | |
| DM duration | −0.532 | −0.359 | −0.209 | −1.482 | 0.145 |  |  |  |  |  | |
| Inulin dosage | 0.128 | 0.589 | 0.031 | 0.217 | 0.829 |  |  |  |  |  | |
